# Supplementary material for: Behavioral Health Risk Factors and Motivation to Change among Cardiovascular General Hospital Patients Aged 50 to 79 Years
Source: MDPI journal article supplement (doi:10.3390/nu14091963), 2022-05-07
Supplement: s1 [file s1]

**Table S1.** Average consumption of food components and non-adherence to dietary recommendations according to the Mediterranean Diet Adherence Screener (Martinez-Gonzalez, Garcia-Arellano et al. 2012) in the total sample, and stratified by non-overweight (BMI<25) and overweight (BMI≥25).

| Items                                                                                                                                                                                                                                                                                                                                | Descriptives           | Total<br>n=325   | Non-overweight<br>n=78 | Overweight<br>n=247 |
|--------------------------------------------------------------------------------------------------------------------------------------------------------------------------------------------------------------------------------------------------------------------------------------------------------------------------------------|------------------------|------------------|------------------------|---------------------|
| Do you mainly use olive or rapeseed oil for cooking?                                                                                                                                                                                                                                                                                 | % No (95% CI)          | 30.8 (26.0-36.0) | 38.5 (28.2-49.9)       | 28.3 (23.0-34.3)    |
| How many tablespoons of olive oil or rapeseed oil do you use on average per week? <sup>1</sup>                                                                                                                                                                                                                                       | Mean (SD)              | 4.3 (5.3)        | 3.8 (4.6)              | 4.4 (5.5)           |
|                                                                                                                                                                                                                                                                                                                                      | Median (IQR)           | 3 (1-6)          | 2 (1-4)                | 3 (1-6)             |
|                                                                                                                                                                                                                                                                                                                                      | % <28 tbsp (95% CI)    | 99.4 (97.5-99.8) | 100.0 (/)              | 99.2 (96.8-99.8)    |
| How many vegetable servings do you usually consume per day? Please do not count potatoes! (1 serving: 200 g) <sup>1</sup> Examples of 1 serving: 2 medium sized carrots, 2-3 large tomatoes, 1/3-1/2 cucumber, 1 kohlrabi, 1 medium zucchini, 2 side dishes, 1 salad plate, 8-10 olives, 1 glass (0.2 l) or more vegetable juice     | Mean (SD)              | 1.5 (1.1)        | 1.5 (1.6)              | 1.5 (0.9)           |
|                                                                                                                                                                                                                                                                                                                                      | Median (IQR)           | 1 (1-2)          | 1 (1-2)                | 1 (1-2)             |
|                                                                                                                                                                                                                                                                                                                                      | % <2 servings (95% CI) | 62.1 (56.7-67.3) | 71.4 (60.1-80.6)       | 59.2 (52.9-65.2)    |
| How many fruit servings do you usually consume per day (1 serving: 80g)? <sup>1</sup> Examples of 1 serving: 1 small apple, 1 small banana, 1 small peach, 1/2 hand full of soft fruit, 1 small bowl of fruit salad, 1 small glass (0.1 l) or more juice with 100% fruit content. Please do not count nectar and fruit juice drinks! | Mean (SD)              | 2.0 (1.7)        | 2.3 (2.5)              | 1.9 (1.4)           |
|                                                                                                                                                                                                                                                                                                                                      | Median (IQR)           | 2 (1-3)          | 2 (1-3)                | 2 (1-3)             |
|                                                                                                                                                                                                                                                                                                                                      | % <3 servings (95% CI) | 73.0 (67.8-77.6) | 71.4 (60.1-80.6)       | 73.5 (67.5-78.7)    |
| How many servings of meat (1 serving: 100-150 g) or meat products (25-30 g) do you consume per week? <sup>2</sup> Examples of 1 serving: 1 schnitzel, 1 roulade, 1 small steak or chop, 1 meatball, 1 bratwurst or 1-2 slices of mortadella, liver sausage, black pudding, ham, salami                                               | Mean (SD)              | 9.5 (6.7)        | 9.5 (7.0)              | 9.5 (6.6)           |
|                                                                                                                                                                                                                                                                                                                                      | Median (IQR)           | 7 (7-14)         | 7 (7-14)               | 7 (7-14)            |
|                                                                                                                                                                                                                                                                                                                                      | % ≥7 servings (95% CI) | 83.0 (78.4-86.7) | 81.8 (71.3-89.1)       | 83.3 (78.1-87.5)    |
| How many servings of butter, margarine, or cream do you consume per day (1 serving: 1 level tablespoon)? <sup>2</sup>                                                                                                                                                                                                                | Mean (SD)              | 1.7 (1.5)        | 1.8 (1.1)              | 1.7 (1.5)           |
|                                                                                                                                                                                                                                                                                                                                      | Median (IQR)           | 1 (1-2)          | 1 (1-2)                | 1 (1-2)             |
|                                                                                                                                                                                                                                                                                                                                      | % ≥1 serving (95% CI)  | 90.7 (87.0-93.4) | 96.1 (88.3-98.8)       | 89.0 (84.4-92.4)    |
| How many sweet or carbonated beverages do you drink per day (1 beverage: 0,33 l)? <sup>2</sup> Please include fruit juice drinks and nectar here.                                                                                                                                                                                    | Mean (SD)              | 1.0 (1.4)        | 1.0 (1.3)              | 1.0 (1.4)           |
|                                                                                                                                                                                                                                                                                                                                      | Median (IQR)           | 0 (0-2)          | 1 (0-2)                | 0 (0-2)             |
|                                                                                                                                                                                                                                                                                                                                      | % ≥1 serving (95% CI)  | 47.4 (41.9-52.9) | 50.6 (39.4-61.8)       | 46.3 (40.2-52.6)    |
| How many servings of legumes (such as beans, peas, lentils) do you consume per week? <sup>2</sup> Examples of 1 serving: 1 small dish or 1 large trowel cooked legumes                                                                                                                                                               | Mean (SD)              | 1.1 (1.1)        | 1.0 (0.8)              | 1.1 (1.2)           |
|                                                                                                                                                                                                                                                                                                                                      | Med (IQR)              | 1 (0-2)          | 1 (1-1)                | 1 (0-2)             |
|                                                                                                                                                                                                                                                                                                                                      | % <3 servings (95% CI) | 94.7 (91.7-96.7) | 96.1 (88.3-98.8)       | 94.3 (90.6-96.6)    |
| How many servings of fish (1 serving: 100-150 g) or seafood (1 serving: 200 g) do you consume per week? <sup>2</sup> Examples of 1 serving: 1 small salmon fillet, 1/2 mackerel, 1/2 herring, 1/2 gourmet fillet, 1 large redfish fillet, 1 plaice, 1 trout, 1 sole, 1 fish bowl, 4-5 king prawns, 1 small box of mussels            | Mean (SD)              | 1.5 (1.3)        | 1.3 (1.1)              | 1.5 (1.3)           |
|                                                                                                                                                                                                                                                                                                                                      | Median (IQR)           | 1 (1-2)          | 1 (1-2)                | 1 (1-2)             |
|                                                                                                                                                                                                                                                                                                                                      | % <3 servings (95% CI) | 86.4 (82.2-89.7) | 90.9 (81.9-95.7)       | 85.0 (79.9-88.9)    |

|                                                                                                                                                                     |                        |                  |                  |                  |
|---------------------------------------------------------------------------------------------------------------------------------------------------------------------|------------------------|------------------|------------------|------------------|
| How many servings of sweets (1 serving: 20 g) or pastries (1 serving: 50-70 g) do you consume per week? <sup>2</sup>                                                | Mean (SD)              | 3.0 (3.4)        | 3.2 (3.5)        | 2.9 (3.4)        |
|                                                                                                                                                                     | Median (IQR)           | 2 (1-4)          | 2 (1-4)          | 2 (1-3)          |
| Examples of 1 serving: 4 candies, 20 small gummy bears, 1 small bar, 4 pieces of chocolate, 3-7 biscuits, 1 small croissant, 1 small piece of cake, ½ piece of tart | % ≥3 servings (95% CI) | 40.9 (35.6-46.3) | 42.9 (32.1-54.3) | 40.2 (34.3-46.5) |
| How many servings of nuts (such as walnuts, hazelnuts, peanuts) do you consume per week (1 serving: 30 g)? <sup>2</sup>                                             | Mean (SD)              | 1.1 (1.5)        | 1.3 (1.7)        | 1.1 (1.5)        |
|                                                                                                                                                                     | Median (IQR)           | 1 (0-2)          | 1 (0-2)          | 1 (0-2)          |
| Examples of 1 serving: 1 small handful, 6-7 walnuts, 20 hazelnuts, 2-3 tablespoons chopped nuts                                                                     | % <3 servings (95% CI) | 86.1 (81.8-89.5) | 83.1 (72.8-90.1) | 87.0 (82.1-90.7) |
| Do you season 2 times a week or more often pasta, vegetable or rice dishes with garlic, tomatoes, leeks or onions? <sup>2</sup>                                     | % No (95% CI)          | 23.5 (19.2-28.5) | 24.7 (16.2-35.8) | 23.2 (18.3-28.9) |

Notes: n=Number, 95% CI=95% Confidence interval, SD=Standard deviation, IQR=Interquartil range, tbsp=tablespoon, g=gram, l=liter. <sup>1</sup> data available for n=322 patients, <sup>2</sup> data available for n=323 patients.

Martinez-Gonzalez, M. A., et al. (2012). "A 14-item Mediterranean diet assessment tool and obesity indexes among high-risk subjects: the PREDIMED trial." PLoS One 7(8): e43134.
